# Supplementary material
Source: PubMed Central journal article supplement (PMC2943760)

TSD      Poly(A) Tail      Young Family

Liu et al, 1997

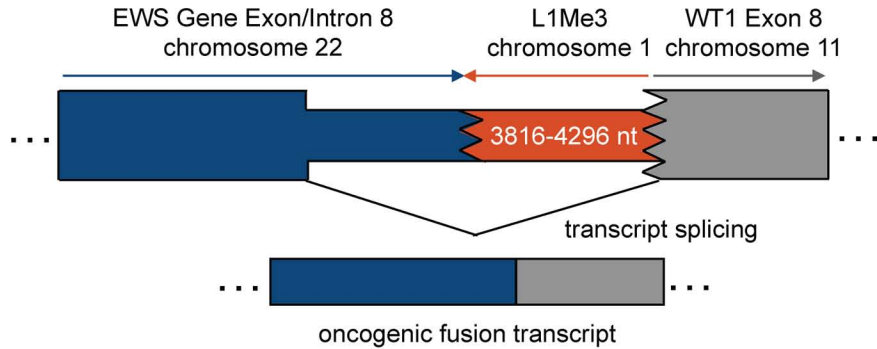

NO

NO

NO

Miki et al, 1992

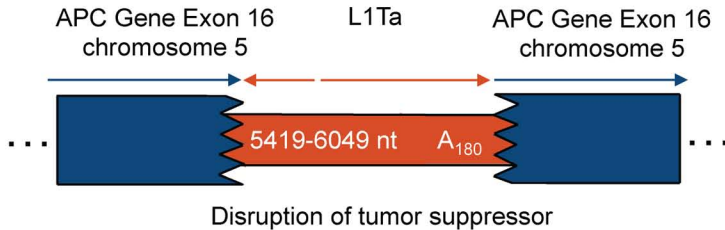

YES

YES

YES

Morse et al, 1988

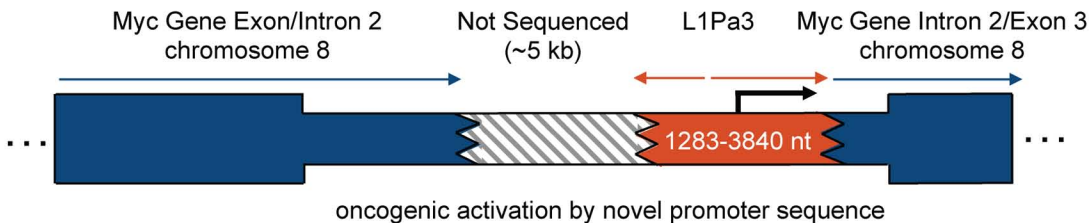

?

?

NO

Supplement: NIHMS223984-supplement-07.pdf [file NIHMS223984-supplement-07.pdf]
